# Supplementary material for: Inducing forgetting of unwanted memories through subliminal reactivation
Source: Springer Nature journal article supplement (doi:10.1038/s41467-022-34091-1), 2022-10-30
Supplement: MOESM1 [file 41467_2022_34091_MOESM1_ESM.pdf]

Supplementary Tables

Table 1. Suppression-induced forgetting from Experiment 1 (%)

| Think            | No-think<br>conscious | No-think<br>unconscious | Control          |
|------------------|-----------------------|-------------------------|------------------|
| 64.79<br>(25.14) | 54.79<br>(26.95)      | 55.83<br>(24.33)        | 61.67<br>(25.09) |

Table 2. Shadow-induced forgetting from Experiment 1 (%)

|                | Independent Cue  |                       |                         |                  | Trained Cue      |                       |                         |                  |
|----------------|------------------|-----------------------|-------------------------|------------------|------------------|-----------------------|-------------------------|------------------|
|                | Think            | No-think<br>conscious | No-think<br>unconscious | Control          | Think            | No-think<br>conscious | No-think<br>unconscious | Control          |
| Identification | 60.42<br>(23.17) | 56.67<br>(20.60)      | 54.58<br>(21.35)        | 65.83<br>(23.56) | 49.73<br>(21.89) | 43.33<br>(18.31)      | 45.39<br>(17.14)        | 55.49<br>(20.63) |
| Gist           | 82.08<br>(19.75) | 72.50<br>(24.03)      | 74.17<br>(20.31)        | 79.58<br>(21.18) | 63.72<br>(18.91) | 56.74<br>(24.37)      | 56.56<br>(18.10)        | 64.79<br>(22.28) |

Table 3. Suppression-induced forgetting from Experiment 2 (%)

| Think            | No-think<br>novel | No-think<br>old  | Control          |
|------------------|-------------------|------------------|------------------|
| 69.62<br>(23.97) | 55.42<br>(24.64)  | 56.67<br>(24.55) | 61.04<br>(21.88) |

Table 4. Shadow-induced forgetting from Experiment 2 (%)

|                | Independent Cue  |                         |                  | Trained Cue      |                         |                  |
|----------------|------------------|-------------------------|------------------|------------------|-------------------------|------------------|
|                | Think            | No-think<br>unconscious | Control          | Think            | No-think<br>unconscious | Control          |
| Identification | 60.50<br>(25.55) | 52.83<br>(28.35)        | 62.08<br>(19.96) | 77.08<br>(22.04) | 68.96<br>(31.14)        | 77.08<br>(25.79) |
| Gist           | 45.22<br>(24.45) | 40.10<br>(24.42)        | 49.44<br>(16.86) | 57.21<br>(20.19) | 48.93<br>(24.14)        | 58.37<br>(22.68) |
